# Supplementary material for: Graphene-quantum-dot-composited platinum nanotube arrays as a dual efficient electrocatalyst for the oxygen reduction reaction and methanol electro-oxidation
Source: Royal Society of Chemistry journal article supplement (doi:10.1039/d0ta12418d), 2021-01-01
Supplement: d0ta12418d1.pdf [file d0ta12418d1.pdf]

## Supporting Information

Graphene-quantum-dot-composited platinum nanotube arrays as a dual efficient electrocatalyst for the oxygen reduction reaction and methanol electro-oxidation

Lili Zhang,<sup>a</sup> Panpan Lu,<sup>a</sup> Yaru Luo,<sup>b</sup> Jin You Zheng,<sup>a</sup> Wei Ma,<sup>\*a</sup> Liang-Xin Ding <sup>\*b</sup> and Haihui Wang <sup>\*c</sup>

<sup>a</sup>Engineering Research Center of Advanced Functional Material Manufacturing of Ministry of Education, School of Chemical Engineering, Zhengzhou University, Zhengzhou 450001, China.

<sup>b</sup>School of Chemistry and Chemical Engineering, South China University of Technology, Guangzhou 510640, China.

<sup>c</sup>Beijing Key Laboratory for Membrane Materials and Engineering, Department of Chemical Engineering, Tsinghua University, Beijing 100084, China.

**\*Email:** mawei@zzu.edu.cn; lxding@scut.edu.cn; cehhwang@tsinghua.edu.cn.

### Table of Contents

|                                |         |
|--------------------------------|---------|
| I. Supplementary Methods.....  | S1-S3   |
| II. Supplementary Figures..... | S4-S8   |
| III. Supplementary Tables..... | S9-S11  |
| IV. References.....            | S12-S14 |

## I. Supplementary Methods

### Electrochemically active surface area (ECSA) calculation

CV measurements were conducted in N<sub>2</sub> saturated 0.5 M H<sub>2</sub>SO<sub>4</sub> solution at a scan rate of 50 mV s<sup>-1</sup>. The electrochemically active surface area (ECSA) of catalysts was calculated using eq.1 and eq.2:<sup>1</sup>

$$\text{ECSA} = Q_{\text{H}} / (m \times q_{\text{H}}) \quad (1)$$

Where Q<sub>H</sub> is the under-potentially deposited hydrogen charge, m is the loading amount of metal, and q<sub>H</sub> is the charge required for monolayer adsorption of hydrogen on a Pt surface, which is assumed to be 0.21 mC cm<sup>-2</sup>.

$$Q_{\text{H}} = \int_0^{0.35} \frac{I[\text{A}] \times dE[\text{V}]}{v[\text{V/S}]} \quad (2)$$

Where I is the current, E the potential, v the scan rate.

### Transfer electron numbers (*n*) calculation

ORR were test in O<sub>2</sub> saturated 0.1 M HClO<sub>4</sub> solution at 5 mV s<sup>-1</sup>. The transfer electron numbers per oxygen molecule (*n*) in the ORR was determined by the K-L equations as follows:<sup>2,3</sup>

$$(i) \quad \frac{1}{j} = \frac{1}{j_k} + \frac{1}{Bw^{1/2}} \quad (3)$$

where *j* is the measured current density, *j<sub>k</sub>* is the kinetic current density and *w* is the angular velocity of the disk (*w*=2π*N*, *N* is the linear rotation speed).

$$B = 0.62nFC_{O_2} (D_{O_2})^{2/3} v^{-1/6} \quad (4)$$

where *n* represents the overall number of electrons gained per oxygen, F is the Faraday constant (F=96485 C mol<sup>-1</sup>), C<sub>O<sub>2</sub></sub> is the bulk concentration of O<sub>2</sub> (1.26×10<sup>-3</sup>

mol L<sup>-1</sup>),  $D_{O_2}$  is the diffusion coefficient of O<sub>2</sub> in 0.1 M HClO<sub>4</sub> electrolyte ( $1.93 \times 10^{-5}$  cm<sup>2</sup> s<sup>-1</sup>),  $\nu$  is the kinetic viscosity of the electrolyte ( $1.009 \times 10^{-2}$  cm<sup>2</sup> s<sup>-1</sup>).

$$(ii) \quad n = 4I_d / (I_d + I_r / N) \quad (5)$$

where  $I_d$  is the disk current,  $I_r$  is the ring current and  $N$  is the collection efficiency. The value of  $N$  was experimentally determined to be 0.37 by using a standard ferricyanide system.<sup>4</sup>

### **Density functional theory (DFT) method and model**

The Pt (111), Pt (200), Pt (111) + C (101) and Pt (200) + C (101) surfaces were built, where the vacuum space along the  $z$  direction is set to be 18 Å, which is enough to avoid interaction between the two neighboring images. Then O<sub>2</sub> molecule was loaded on the surface. The bottom two atomic layers were fixed, the top three atomic layers were relaxed adequately for Pt (111) and Pt (200) surfaces, and all atoms were relaxed adequately for Pt (111) + C (101) and Pt (200) + C (101) surfaces. The first principles calculations in the framework of density functional theory were carried out based on the Cambridge Sequential Total Energy Package known as CASTEP.<sup>5</sup> The exchange-correlation functional under the generalized gradient approximation (GGA)<sup>6</sup> with norm-conserving pseudopotentials and Perdew-Burke-Ernzerhof functional was adopted to describe the electron-electron interaction.<sup>7</sup> An energy cutoff of 750 eV was used and a  $k$ -point sampling set of 5 x 5 x 1 were tested to be converged. A force tolerance of 0.01 eV Å<sup>-1</sup>, energy tolerance of  $5.0 \times 10^{-7}$  eV per atom and maximum displacement of  $5.0 \times 10^{-4}$  Å were considered. The Grimme method for DFT-D correction is considered for all calculations.<sup>8</sup>

Adsorption energy  $\Delta E$  of A ( $=O_2$ ) molecule on the surface of substrates was defined as:<sup>9</sup>

$$\Delta E = E_{*A} - (E_* + E_A) \quad (6)$$

where  $*A$  and  $*$  denote the adsorption of A molecule on substrates and the bare substrates,  $E_A$  denotes the energy of A molecule. The energy of  $O_2$  gas was calculated by  $(2E_{H_2O} - 2E_{H_2} + 4.92)$ , since the negative of experimental energy of formation of two water molecules ( $-2\Delta_{H_2O}^{exp} = 4.92$  eV).<sup>10</sup>

## II. Supplementary Figures

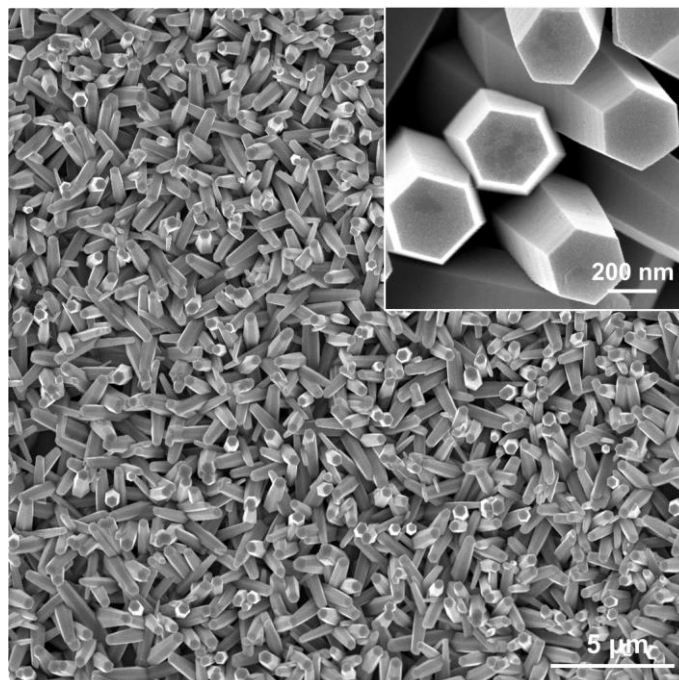

**Fig. S1.** SEM images of ZnO nanorod arrays.

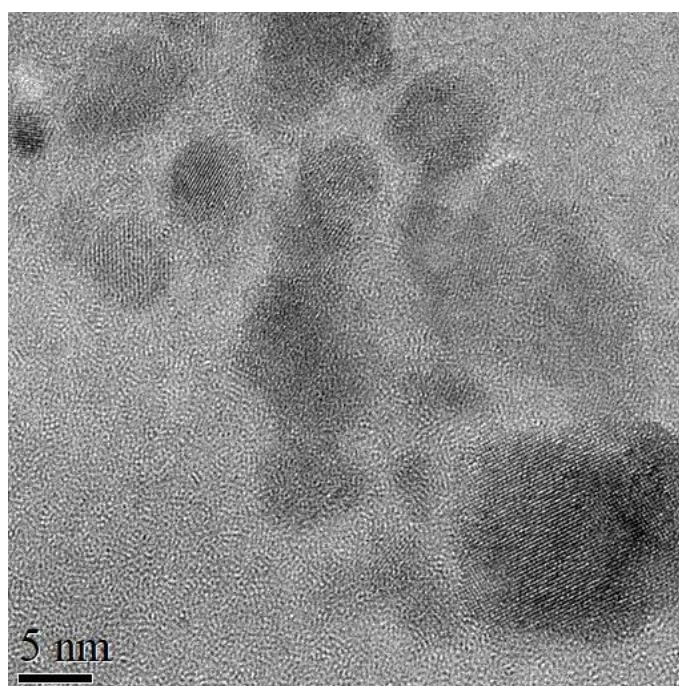

**Fig. S2.** TEM image of GQDs.

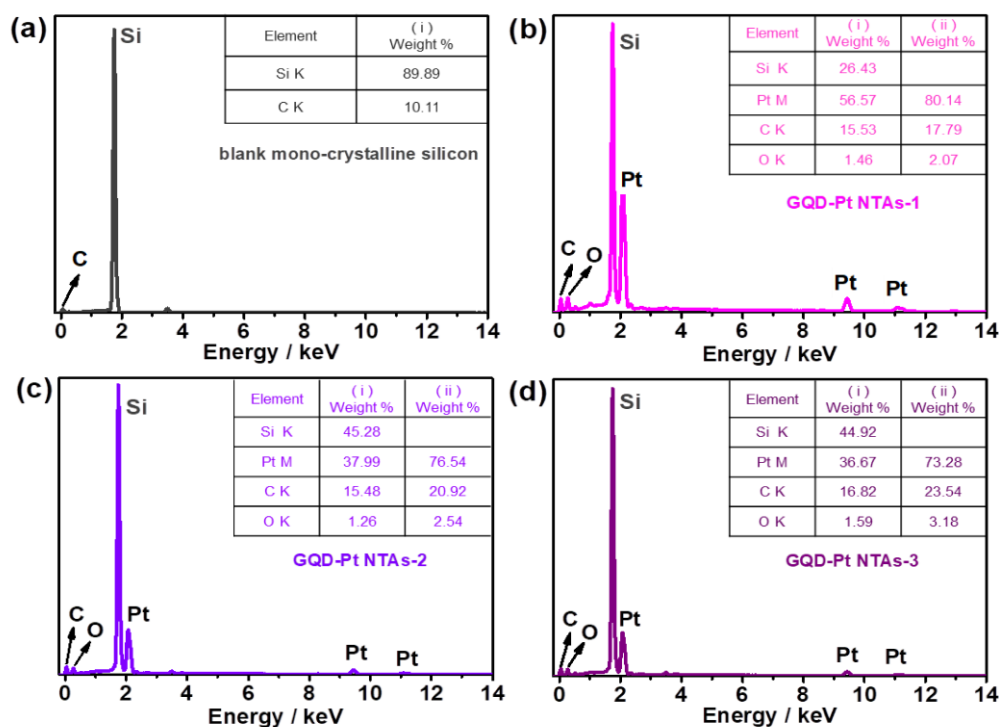

**Fig. S3.** SEM-EDS spectrum of (a) blank mono-crystalline silicon, (b) GQD-Pt NTAs-1, (c) GQD-Pt NTAs-2, and (d) GQD-Pt NTAs-3.

The GQD-Pt NTAs catalysts with different amounts of GQDs were obtained by electroreducing mixed solution with the ratio of 1:1, 2:1 or 4:1 for  $\text{H}_2\text{PtCl}_6 \cdot 6\text{H}_2\text{O}$  to GQDs, which are denoted GQD-Pt NTAs-1, GQD-Pt NTAs-2 and GQD-Pt NTAs-3, respectively. The SEM-EDS of these GQD-Pt NTAs catalysts are measured on a blank mono-crystalline silicon substrate. As shown in **Fig. S3**, (i) represents the element content of the sample and substrate, and (ii) represents the element content of the sample after removing impurities in the substrate.

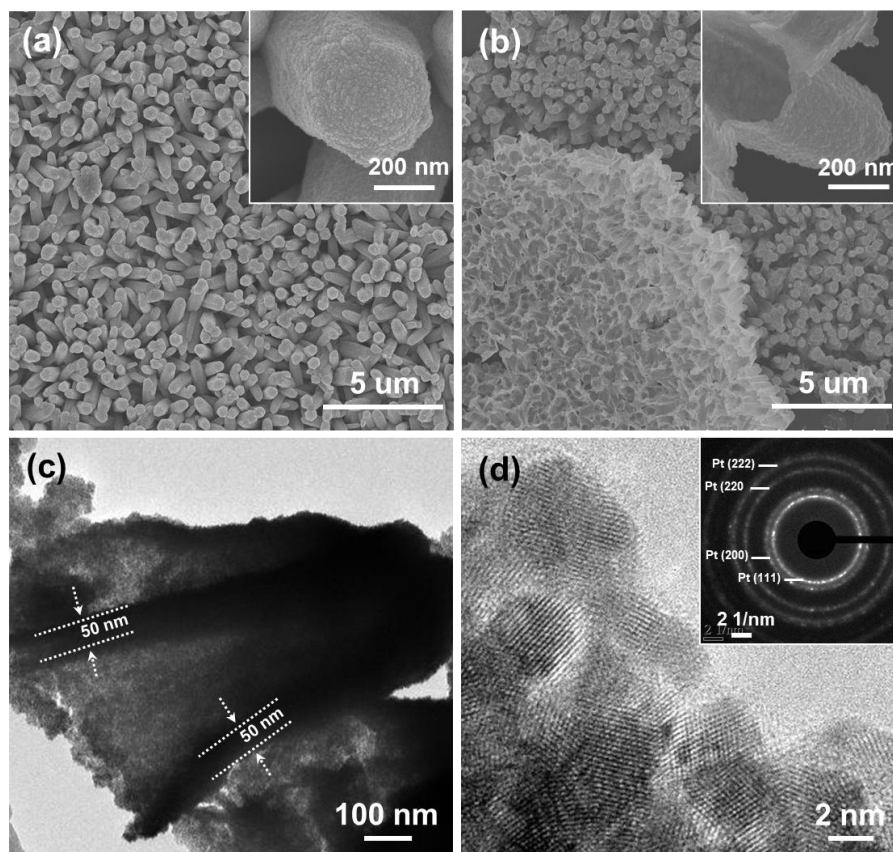

**Fig. S4.** SEM images of (a) ZnO@ Pt core-shell NRAs and (b) Pt NTAs. The insets in (a) and (b) are the high magnification SEM images. (c, d) TEM images and SAED pattern (inset in (d)) of typical Pt NTAs.

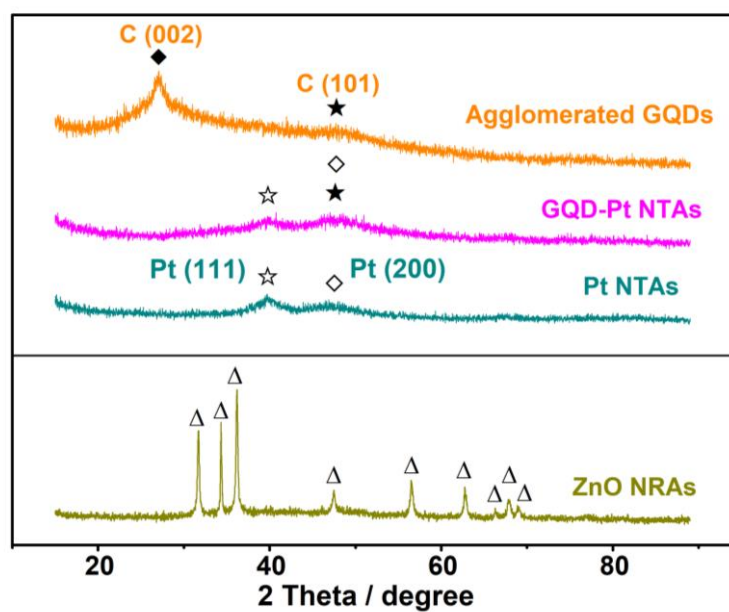

**Fig. S5.** XRD pattern of the as-prepared catalysts.

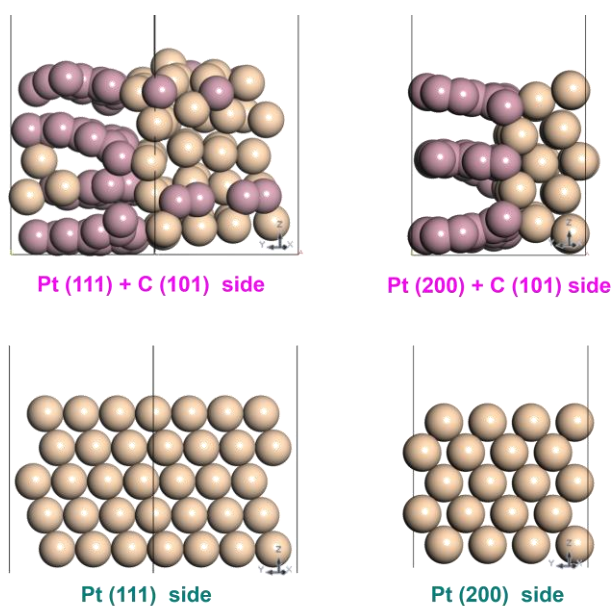

**Fig. S6.** Optimized structural surfaces of Pt (111) + C (101), Pt (200) + C (101), Pt (111) and Pt (200).

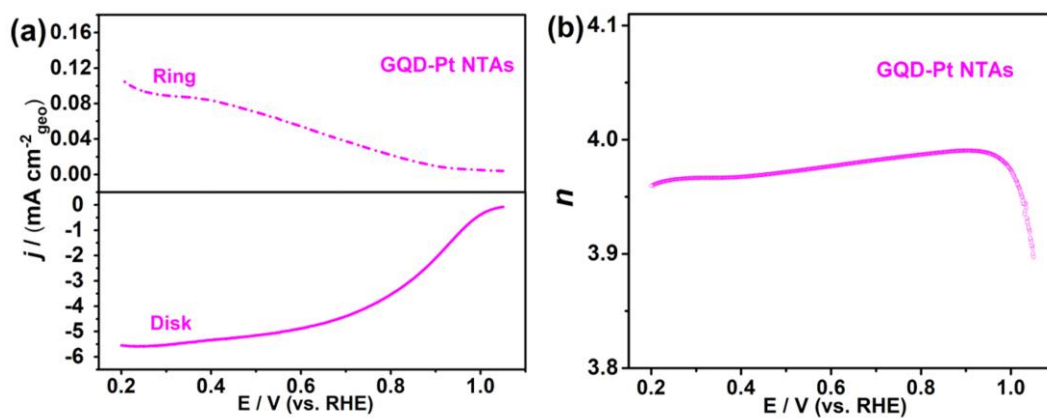

**Fig. S7.** RRDE technique over GQD-Pt NTAs electrocatalyst: (a) polarization curves and (b) the calculated corresponding transferred electron number ( $n$ ).



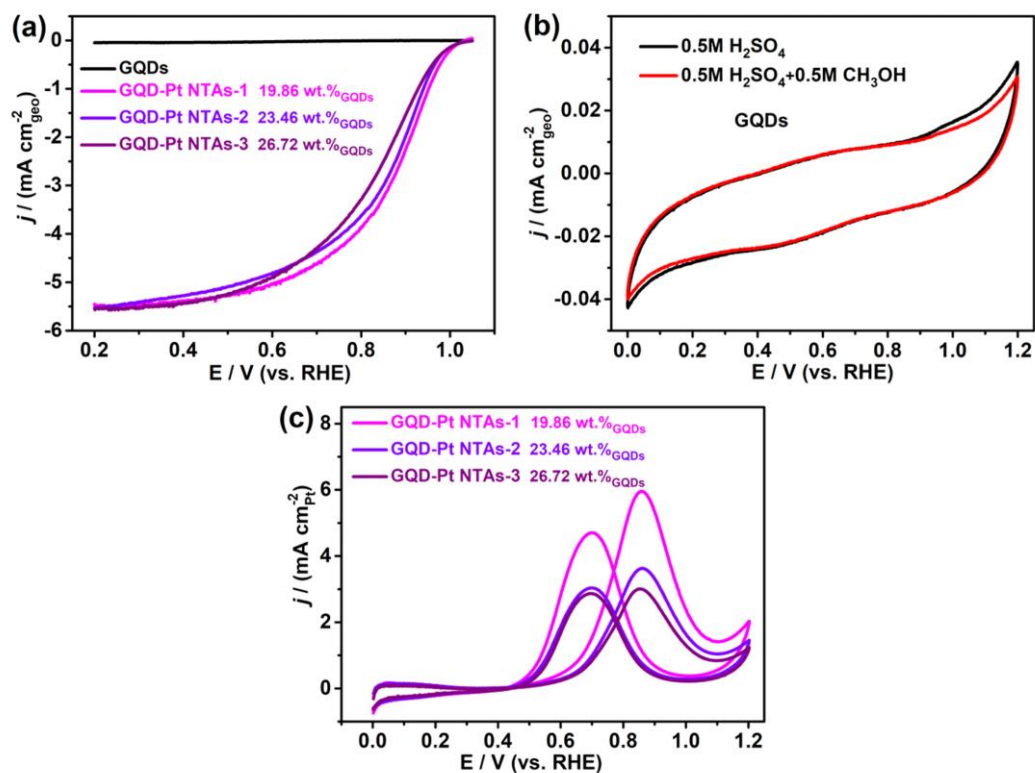

**Fig. S8.** (a) ORR polarization curves. (b) CVs in 0.5 M H<sub>2</sub>SO<sub>4</sub> and 0.5 M CH<sub>3</sub>OH + 0.5 M H<sub>2</sub>SO<sub>4</sub> for GQDs at 50 mV s<sup>-1</sup>. (c) MOR CVs for the GQD-Pt NTAs catalysts with different amounts of GQDs.

### III. Supplementary Tables

**Table S1.** Comparison of the work function, adsorption energy ( $E_{\text{abs}}$ ) and Bader charge values.

| Components                          | Work function (eV) | $E_{\text{abs}}$ (eV) | Bader charge (eV) |
|-------------------------------------|--------------------|-----------------------|-------------------|
| Pt (111)                            | -5.99              | --                    | --                |
| Pt (111) + C (101)                  | -5.23              | --                    | --                |
| Pt (200)                            | -5.84              | --                    | --                |
| Pt (200) + C (101)                  | -5.03              | --                    | --                |
| Pt (111) + O <sub>2</sub>           | --                 | -1.33                 | -0.30             |
| Pt (111) + C (101) + O <sub>2</sub> | --                 | -4.26                 | -0.45             |
| Pt (200) + O <sub>2</sub>           | --                 | -2.56                 | -0.34             |
| Pt (200) + C (101) + O <sub>2</sub> | --                 | -5.37                 | -0.47             |

**Table S2.** The mass activity and specific activity of platinum-based electrocatalysts for ORR.

| Catalysts                              | Conditions                                              | Mass activity<br>(mA $\mu\text{g Pt}^{-1}$ ) | Specific activity<br>(mA $\text{cmPt}^{-2}$ ) | Reference        |
|----------------------------------------|---------------------------------------------------------|----------------------------------------------|-----------------------------------------------|------------------|
| <b>GQD-Pt NTAs</b>                     | <b>0.1M HClO<sub>4</sub><br/>(0.9 V vs. RHE)</b>        | <b>1.14</b>                                  | <b>2.24</b>                                   | <b>This work</b> |
| PtCo NCs                               | 0.1M HClO <sub>4</sub><br>(0.9 V vs. RHE)               | 1.65                                         | 1.85                                          | 11               |
| Pt@holey rGO@Pt                        | 0.5M H <sub>2</sub> SO <sub>4</sub><br>(0.85 V vs. RHE) | 0.60                                         | 2.12                                          | 12               |
| PtNiPb NPs                             | 0.1M HClO <sub>4</sub><br>(0.9 V vs. RHE)               | 0.449                                        | 0.976                                         | 13               |
| FePtCe <sub>1</sub> /C                 | 0.5M H <sub>2</sub> SO <sub>4</sub><br>(0.9 V vs. RHE)  | 0.734                                        | 3.38                                          | 14               |
| Pt <sub>71</sub> Co <sub>29</sub> LNFs | 0.1M HClO <sub>4</sub><br>(0.75 V vs. RHE)              | 0.128                                        | 0.43                                          | 15               |
| Pd <sub>1</sub> Pt <sub>4</sub> DNSs   | 0.1M HClO <sub>4</sub><br>(0.9 V vs. RHE)               | 0.53                                         | 0.74                                          | 16               |

|                             |                                           |       |       |    |
|-----------------------------|-------------------------------------------|-------|-------|----|
| PtPd SAANs                  | 0.1M HClO <sub>4</sub><br>(0.8 V vs. RHE) | 2.75  | 0.95  | 17 |
| PtBi nanoplates/C           | 0.1M HClO <sub>4</sub><br>(0.9 V vs. RHE) | 0.353 | 1.04  | 18 |
| Au/CuPt                     | 0.1M HClO <sub>4</sub><br>(0.9 V vs. RHE) | 1.7   | 2.75  | 19 |
| AuNP@PANI@PtFe              | 0.1M HClO <sub>4</sub><br>(0.8 V vs. RHE) | 0.43  | 2.73  | 20 |
| PtCo/C                      | 0.1M HClO <sub>4</sub><br>(0.8 V vs. RHE) | 0.237 | 0.439 | 21 |
| PtNiRh trimetallic<br>NWs/C | 0.1M HClO <sub>4</sub><br>(0.9 V vs. RHE) | 2.88  | 2.71  | 22 |
| PtPdNiP MNs                 | 0.1M HClO <sub>4</sub><br>(0.9 V vs. RHE) | 0.45  | 0.89  | 23 |
| H-PtNiCu-AAT NPs            | 0.1M HClO <sub>4</sub><br>(0.9 V vs. RHE) | 0.977 | 1.458 | 24 |
| Pt-Co/C                     | 0.1M HClO <sub>4</sub><br>(0.9 V vs. RHE) | 0.64  | 1.29  | 25 |
| Pt/p-BN                     | 0.1M HClO <sub>4</sub><br>(0.9 V vs. RHE) | 1.06  | 1.24  | 26 |
| 37 wt%-FePt/rGO             | 0.1M HClO <sub>4</sub><br>(0.9 V vs. RHE) | 1.96  | 4.1   | 27 |
| Pt/RGO/CB-1                 | 0.1M HClO <sub>4</sub><br>(0.9 V vs. RHE) | 0.109 | 0.212 | 28 |
| APD-Pt/needles-GC           | 0.1M HClO <sub>4</sub><br>(0.9 V vs. RHE) | 0.62  | 1.3   | 29 |

**Table S3.** The mass activity and specific activity of platinum-based electrocatalysts for MOR.

| Catalysts          | Conditions                                                         | Mass activity<br>(mA mg <sub>Pt</sub> <sup>-1</sup> ) | Specific activity<br>(mA cm <sub>Pt</sub> <sup>-2</sup> ) | Reference        |
|--------------------|--------------------------------------------------------------------|-------------------------------------------------------|-----------------------------------------------------------|------------------|
| <b>GQD-Pt NTAs</b> | <b>0.5M H<sub>2</sub>SO<sub>4</sub><br/>+0.5M CH<sub>3</sub>OH</b> | <b>2227.08</b>                                        | <b>5.95</b>                                               | <b>This work</b> |
| PtCo NCs           | 0.5M H <sub>2</sub> SO <sub>4</sub>                                | 514.5                                                 | 2.57                                                      | 11               |

|                                                      |                                                                 |        |       |    |
|------------------------------------------------------|-----------------------------------------------------------------|--------|-------|----|
|                                                      | +0.5M CH <sub>3</sub> OH                                        |        |       |    |
| Pt@holey rGO@Pt                                      | 0.5M H <sub>2</sub> SO <sub>4</sub><br>+0.5M CH <sub>3</sub> OH | 575.2  | 1.05  | 12 |
| PtNiPb NPs                                           | 0.1M HClO <sub>4</sub><br>+0.5M CH <sub>3</sub> OH              | 1160   | 2.40  | 13 |
| FePtCe <sub>1</sub> /C                               | 0.1M HClO <sub>4</sub><br>+0.5M CH <sub>3</sub> OH              | 1018.6 | 1.141 | 14 |
| Pt <sub>71</sub> Co <sub>29</sub> LNFs               | 0.1M HClO <sub>4</sub><br>+0.5M CH <sub>3</sub> OH              | 666.23 | 2.51  | 15 |
| Pd <sub>1</sub> Pt <sub>4</sub> DNSs                 | 0.1M HClO <sub>4</sub><br>+0.5M CH <sub>3</sub> OH              | 1660   | 2.23  | 16 |
| PtPd SAANs                                           | 0.5M H <sub>2</sub> SO <sub>4</sub><br>+0.5M CH <sub>3</sub> OH | 375.99 | 1.30  | 17 |
| PtBi nanoplates/C                                    | 0.1M HClO <sub>4</sub><br>+0.1M CH <sub>3</sub> OH              | 1100   | 3.18  | 18 |
| Au/CuPt                                              | 0.1M HClO <sub>4</sub><br>+0.1M CH <sub>3</sub> OH              | 441    | 0.71  | 19 |
| AuNP@PANI@PtFe                                       | 0.1M HClO <sub>4</sub><br>+0.1M CH <sub>3</sub> OH              | 913    | 28    | 20 |
| PtCo/C                                               | 0.1M HClO <sub>4</sub><br>+1M CH <sub>3</sub> OH                | 2110   | 3.62  | 21 |
| Pt-WP-CL/AEG-3                                       | 0.5M H <sub>2</sub> SO <sub>4</sub><br>+1M CH <sub>3</sub> OH   | 2217   | 1.80  | 30 |
| H-PtNiCu-AAT NPs                                     | 0.1M H <sub>2</sub> SO <sub>4</sub><br>+1M CH <sub>3</sub> OH   | 1875   | 2.798 | 24 |
| Pt/TiO <sub>2</sub> /rGO                             | 0.5M HClO <sub>4</sub><br>+0.5M CH <sub>3</sub> OH              | 698.9  | 1.24  | 31 |
| Pt <sub>x</sub> Fe/C/N-GC-800                        | 0.1M H <sub>2</sub> SO <sub>4</sub><br>+1M CH <sub>3</sub> OH   | 295.63 | 1.12  | 32 |
| RGO/Pt-Pd                                            | 0.5M HClO <sub>4</sub><br>+1M CH <sub>3</sub> OH                | 1419.6 | 15.6  | 33 |
| Ni <sub>0.20</sub> Pt <sub>0.80</sub><br>nanoflowers | 0.5M H <sub>2</sub> SO <sub>4</sub><br>+1M CH <sub>3</sub> OH   | 2200   | 4.15  | 34 |
| PtCo@NC                                              | 0.1M H <sub>2</sub> SO <sub>4</sub><br>+1M CH <sub>3</sub> OH   | 2300   | 5.14  | 35 |

#### IV. References

- 1 J. N. Tiwari, K. C. Kemp, K. Nath, R. N. Tiwari, H.-G. Nam and K. S. Kim, *ACS Nano*, 2013, **7**, 9223-9231.
- 2 M. Shao, T. Huang, P. Liu, J. Zhang, K. Sasaki, M. Vukmirovic and R. Adzic, *Langmuir*, 2006, **22**, 10409-10415.
- 3 V. Stamenković, T. J. Schmidt, P. N. Ross and N. M. Marković, *J. Electroanal. Chem.*, **2003**, 554-555, 191-199.
- 4 Z. Zheng, Y. H. Ng, D.-W. Wang and R. Amal, *Adv. Mater.*, 2016, **28**, 9949-9955.
- 5 M. D. Segall, P. J. D. L. M. J. Probert, C. J. Pickard, P. J. Hasnip, S. J. Clark and M. C. Payne, *J. Phys.: Condens. Matter*, 2002, **14**, 2717-2744.
- 6 J. P. Perdew, K. Burke and M. Ernzerhof, *Phys. Rev. Lett.*, 1996, **77**, 3865.
- 7 D. R. Hamann, M. Schlüter and C. Chiang, *Phys. Rev. Lett.*, 1979, **43**, 1494-1497.
- 8 S. Grimme, *J. Comput. Chem.*, 2006, **27**, 1787-1799.
- 9 Y. Li, Q. Zhang, C. Li, H.-N. Fan, W.-B. Luo, H.-K. Liu and S.-X. Dou, *J. Mater. Chem. A*, 2019, **7**, 22242-22247.
- 10 Y. Wu, C. Li, W. Liu, H.H. Li, Y. Y. Gong, L. Y. Niu, X. J. Liu, C. Q. Sun and S. Q. Xu, *Nanoscale*, 2019, **11**, 5064-5071.
- 11 Q. Chen, Z. Cao, G. Du, Q. Kuang, J. Huang, Z. Xie and L. Zheng, *Nano Energy*, 2017, **39**, 582-589.
- 12 X. Qiu, X. Yan, K. Cen, D. Sun, L. Xu and Y. Tang, *ACS Appl. Energy Mater.*, 2018, **1**, 2341-2349.
- 13 N. Cheng, L. Zhang, H. Jiang, Y. Zhou, S. Yu, L. Chen, H. Jiang and C. Li, *Nanoscale*, 2019, **11**, 16945-16953.
- 14 J. Ma, X. Tong, J. Wang, G. Zhang, Y. Lv, Y. Zhu, S. Sun, Y.-C. Yang and Y. Song, *Electrochim. Acta*, 2019, **299**, 80-88.
- 15 L. Zhang, X.-F. Zhang, X.-L. Chen, A.-J. Wang, D.-M. Han, Z.-G. Wang and J.-J. Feng, *J. Colloid Interface Sci.*, 2019, **536**, 556-562.
- 16 X. Peng, D. Lu, Y. Qin, M. Li, Y. Guo and S. Guo, *ACS Appl. Mater. Interfaces*,

- 2020, **12**, 30336-30342.
- 17 Y.-C. Shi, L.-P. Mei, A.-J. Wang, T. Yuan, S.-S. Chen and J.-J. Feng, *J. Colloid Interface Sci.*, 2017, **504**, 363-370.
- 18 Y. Qin, M. Luo, Y. Sun, C. Li, B. Huang, Y. Yang, Y. Li, L. Wang and S. Guo, *ACS Catal.*, 2018, **8**, 5581-5590.
- 19 X. Sun, D. Li, Y. Ding, W. Zhu, S. Guo, Z. L. Wang and S. Sun, *J. Am. Chem. Soc.*, 2014, **136**, 5745-5749.
- 20 J.-E. Lee, Y. J. Jang, W. Xu, Z. Feng, H.-Y. Park, J. Y. Kim and D. H. Kim, *J. Mater. Chem. A*, 2017, **5**, 13692-13699.
- 21 Y. Ma, L. Yin, T. Yang, Q. Huang, M. He, H. Zhao, D. Zhang, M. Wang and Z. Tong, *ACS Appl. Mater. Interfaces*, 2017, **9**, 36164-36172.
- 22 K. Li, X. Li, H. Huang, L. Luo, X. Li, X. Yan, C. Ma, R. Si, J. Yang and J. Zeng, *J. Am. Chem. Soc.*, 2018, **140**, 16159-16167.
- 23 C. Li, Y. Xu, K. Deng, S. Yin, Z. Wang, H. Xue, X. Li, L. Wang and H. Wang, *J. Mater. Chem. A*, 2019, **7**, 3910-3916.
- 24 D. Wu, W. Zhang, A. Lin and D. Cheng, *ACS Appl. Mater. Interfaces*, 2020, **12**, 9600-9608.
- 25 W. Lei, M. Li, L. He, X. Meng, Z. Mu, Y. Yu, F. M. Ross and W. Yang, *Nano Research*, 2020, **13**, 638-645.
- 26 Q. Li, L. Li, X. Yu, X. Wu, Z. Xie, X. Wang, Z. Lu, X. Zhang, Y. Huang and X. Yang, *Chem. Eng. J.*, 2020, **399**, 125827.
- 27 T. Y. Yoo, J. M. Yoo, A. K. Sinha, M. S. Bootharaju, E. Jung, H. S. Lee, B.-H. Lee, J. Kim, W. H. Antink, Y. M. Kim, J. Lee, E. Lee, D. W. Lee, S.-P. Cho, S. J. Yoo, Y.-E. Sung and T. Hyeon, *J. Am. Chem. Soc.*, 2020, **142**, 14190-14200.
- 28 Y. Li, Y. Li, E. Zhu, T. McLouth, C.-Y. Chiu, X. Huang and Y. Huang, *J. Am. Chem. Soc.*, 2012, **134**, 12326-12329.
- 29 X. Zhao, Y. Hamamura, Y. Yoshida, T. Kaneko, T. Gunji, S. Takao, K. Higashi, T. Uruga and Y. Iwasawa, *ACS Appl. Energy Mater.*, 2020, **3**, 5542-5551.
- 30 C. Zhang, Y. Dai, H. Chen, Y. Ma, B. Jing, Z. Cai, Y. Duan, B. Tang and J. Zou, *J.*

- Mater. Chem. A*, 2018, **6**, 22636-22644.
- 31 S. Wu, J. Liu, Y. Ye, Z. Tian, X. Zhu and C. Liang, *ACS Appl. Energy Mater.*, 2019, **2**, 5577-5583.
- 32 J. Zhao, H. Huang, M. Liu, J.-H. Wang, K. Liu and Z.-Y. Li, *RSC Advances*, 2019, **9**, 26450-26455.
- 33 M. F. R. Hanifah, J. Jaafar, M. H. D. Othman, A. F. Ismail, M. A. Rahman, N. Yusof, F. Aziz and N. A. A. Rahman, *J. Alloys Compd.*, 2019, **793**, 232-246.
- 34 A. Shan, S. Huang, H. Zhao, W. Jiang, X. Teng, Y. Huang, C. Chen, R. Wang and W.-M. Lau, *Nano Research*, 2020, **13**, 3088-3097.
- 35 G. Hu, L. Shang, T. Sheng, Y. Chen and L. Wang, *Adv. Funct. Mater.*, 2020, **30**, 2002281.
